# Supplementary material for: Deducing Underlying Mechanisms from Protein Recruitment Data
Source: PubMed Central journal article supplement (PMC3694963; doi:10.1371/journal.pone.0066590), 2013-06-27
Supplement: pone.0066590.s001.pdf [file pone.0066590.s001.pdf]

# Appendix

## A. One protein one substrate model

### Derivation of equation (8)

If dissociation is negligible, the set of differential equations is given by:

$$\frac{d[P_b]}{dt} = -\frac{d[P]}{dt} = -\frac{d[S]}{dt} = k_1[P][S]. \quad (\text{A1})$$

To solve this, we need the following equations, which describe that the total number of particles is preserved:

$$[P_b] = P_0 - [P] = S_0 - [S]. \quad (\text{A2})$$

With this, we can write:

$$\frac{d[S]}{dt} = -k_1([S] + P_0 - S_0)[S]. \quad (\text{A3})$$

Now, we use the method *separation of variables* to get:

$$\frac{d[S]}{[S]([S] + P_0 - S_0)} = -k_1 dt. \quad (\text{A4})$$

From [1] we know the formula:

$$\int \frac{dx}{x(ax+b)} = -\frac{1}{b} \ln \left| \frac{ax+b}{x} \right| + c \quad (\text{A5})$$

with the constant of integration  $c$ .

Using eq. (A5) to integrate eq. (A4) leads to:

$$-\frac{1}{P_0 - S_0} \ln \left| \frac{[S] + P_0 - S_0}{[S]} \right| = -k_1 t - c \quad (\text{A6})$$

From eq. (A2) we know that  $[S] + P_0 - S_0 = [P] \geq 0$ , which allows rewriting eq. (A6) without the modulus function:

$$\ln \frac{[S] + P_0 - S_0}{[S]} = (k_1 t + c)(P_0 - S_0) \quad (\text{A7})$$

If we solve this equation for  $[S]$  and choose the constant of integration in a way, which fullfills the condition  $[S](t=0) = S_0$ , we get the solution for  $[S]$ :

$$\frac{[S]}{S_0} = \frac{1 - \frac{S_0}{P_0}}{e^{(1 - \frac{S_0}{P_0})k_1^* t} - \frac{S_0}{P_0}} \quad (\text{A8})$$

Using eq. (A2) leads to the solution for  $[P_b]$ :

$$\frac{[P_b](t)}{S_0} = 1 - \frac{1 - \frac{S_0}{P_0}}{e^{(1 - \frac{S_0}{P_0})k_1^* t} - \frac{S_0}{P_0}}, \quad (\text{A9})$$

## Derivation of equation (9)

If the dissociation rate is not negligible, the set of differential equations is given by:

$$\frac{d[P_b]}{dt} = -\frac{d[P]}{dt} = -\frac{d[S]}{dt} = k_1[P][S] - k_{-1}[P_b]. \quad (\text{A10})$$

To solve this, we use the same steps as presented in the derivation of eq. (8). This leads to:

$$\frac{d[S]}{[S]^2 + (P_0 - S_0 + \frac{k_{-1}}{k_1})S - \frac{k_{-1}}{k_1}S_0} = -k_1 dt \quad (\text{A11})$$

To integrate this equation we use the following formula from [1]:

$$\int \frac{dx}{ax^2 + bx + r} = \frac{1}{\sqrt{b^2 - 4ar}} \ln \left| \frac{2ax + b - \sqrt{b^2 - 4ar}}{2ax + b + \sqrt{b^2 - 4ar}} \right| + c, \quad (\text{A12})$$

with the constant of integration  $c$ .

After the integration of eq. (A11), we get:

$$\frac{1}{\sqrt{b^2 - 4r}} \ln \left| \frac{2[S] + b - \sqrt{b^2 - 4r}}{2[S] + b + \sqrt{b^2 - 4r}} \right| = -k_1 t - c, \quad (\text{A13})$$

with:

$$b = P_0 - S_0 + \frac{k_{-1}}{k_1}, \quad (\text{A14})$$

$$r = -\frac{k_{-1}}{k_1} S_0. \quad (\text{A15})$$

Next, we will show that  $2[S] + b - \sqrt{b^2 - 4r} \geq 0$ .

First, we need to know all possible values of  $[S]$ , for which we calculate the minimum  $S^*$ , which corresponds to the limit  $\lim_{t \rightarrow \infty} [S](t)$ . This limit has to fulfill the following equation:

$$\frac{dS^*}{dt} = k_1[P^*][S^*] - k_{-1}[P_b^*] = 0 \quad (\text{A16})$$

From eq. (A2), we know that  $P^* = S^* + P_0 - S_0$  and  $P_b^* = S_0 - S^*$ , which together with eq. (A16) leads to:

$$S^* = -\frac{P_0 - S_0 + \frac{k_1}{k_{-1}}}{2} + \sqrt{\frac{(P_0 - S_0 + \frac{k_1}{k_{-1}})^2}{4} + \frac{k_{-1}}{k_1} S_0} \quad (\text{A17})$$

Since we always use the starting condition  $P_b(t=0) = 0$ , the value of  $\frac{d[S]}{dt}$  never will be positive and  $[S]$  will monotonously decline from  $S_0$  to  $S^*$ . This means that all possible values of  $[S]$  are given by:

$$S_0 \geq [S] \geq S^* \quad (\text{A18})$$

With this it can be shown that:

$$2[S] + b - \sqrt{b^2 - 4r} \geq 2S^* + b - \sqrt{b^2 - 4r} = 0. \quad (\text{A19})$$

Now, we can write eq. (A13) without the modulus function:

$$\frac{1}{\sqrt{b^2 - 4r}} \ln \frac{2[S] + b - \sqrt{b^2 - 4r}}{2[S] + b + \sqrt{b^2 - 4r}} = -k_1 t - c, \quad (\text{A20})$$

Solving this equation for  $[S]$  and using  $[P_b] = S_0 - [S]$  leads to the solution presented in the paper (eq.(9)).

## B. Two protein one substrate models

### Derivation of equations (24)-(27) and (44)-(47)

We start with the following set of differential equations:

$$\frac{d[S]}{dt} = -(k_{S+A} + k_{S+B})[S], \quad (\text{A21})$$

$$\frac{d[SA]}{dt} = k_{S+A}[S] - k_{SA+B}[SA], \quad (\text{A22})$$

$$\frac{d[SB]}{dt} = k_{S+B}[S] - k_{S+A}[SB], \quad (\text{A23})$$

$$\frac{d[SAB]}{dt} = k_{S+A}[SB] + k_{SA+B}[SA]. \quad (\text{A24})$$

The solution of  $[S](t)$  is trivial:

$$[S](t) = S_0 e^{-(k_{S+A} + k_{S+B})t}. \quad (\text{A25})$$

Now, we can rewrite equation (A23):

$$\frac{d[SB]}{dt} = -k_{S+A}[SB] + k_{S+B}S_0 e^{-(k_{S+A} + k_{S+B})t}, \quad (\text{A26})$$

This is an inhomogeneous linear ordinary differential equation, which can be solved by the standard method *variation of parameters* to get the solution of  $[SB](t)$  (equation (26)). The same steps apply to equation (A22) to get the solution of  $[SA](t)$  (equation (25)). Now, it is possible to compute the solution of  $[SAB](t)$  by integrating the right hand side of equation (A24).

The derivation of equations (44) to (47) consists of the same steps as presented above: First,  $[S](t)$  is computed, which allows rewriting the differential equations of  $[SA](t)$  and  $[SB](t)$ , which in turn can be solved by the method *variation of parameters*. Finally, it is possible to get the solution of  $[SAB](t)$  by integration.

### Derivation of equations (35)-(38) and (52)-(55)

We start with the following set of differential equations:

$$\frac{d[S]}{dt} = -(k_{S+A} + k_{S+B})[S] + k_{SB-B}[SB], \quad (\text{A27})$$

$$\frac{d[SA]}{dt} = k_{S+A}[S] + k_{SB-B}[SAB] - k_{SA+B}[SA], \quad (\text{A28})$$

$$\frac{d[SB]}{dt} = k_{S+B}[S] - (k_{S+A} + k_{SB-B})[SB], \quad (\text{A29})$$

$$\frac{d[SAB]}{dt} = k_{S+A}[SB] + k_{SA+B}[SA] - k_{SB-B}[SAB]. \quad (\text{A30})$$

Adding the first to the third equation as well as adding the second to the fourth equation leads to:

$$\frac{d([S] + [SB])}{dt} = -k_{S+A}([S] + [SB]), \quad (\text{A31})$$

$$\frac{d([SA] + [SAB])}{dt} = k_{S+A}([SA] + [SAB]). \quad (\text{A32})$$

This set of differential equations is similar to the one presented in the methods section of the paper (equation (5)) if  $[S]$  from equation (5) is substituted by  $([S] + [SB])$  and  $[P_b]$  from equation (5) is substituted by  $([SA] + [SAB])$ . Hence, the solution is given by equation (6) and (7) with the described substitutions:

$$[S](t) + [SB](t) = S_0 e^{-k_{S+A}t}, \quad (\text{A33})$$

$$[SA](t) + [SAB](t) = S_0(1 - e^{-k_{S+A}t}). \quad (\text{A34})$$

Solving equation (A33) for  $[S](t)$  leads to equation (35), which allows rewriting equation (A29):

$$\frac{d[SB]}{dt} = k_{S+B}(S_0 e^{-k_{S+A}t} - [SB]) - (k_{S+A} + k_{SB-B})[SB]. \quad (\text{A35})$$

Again, it is possible to use the method *variation of parameters* to solve this inhomogeneous differential equation, which leads to the solution for  $[SB](t)$  (equation (36)).

Using the same steps, it is possible to compute the solution for  $[SA](t)$  and  $[SAB](t)$ : First, equation (A34) has to be solved for  $[SA](t)$ , which leads to equation (37). Then, it is necessary to plug in the formula for  $[SA](t)$  (equation (37)) and the solution of  $[SB](t)$  (equation (36)) into equation (A30) to get a differential equation, in which only  $[SAB](t)$  is unknown. This can be solved by using the *variation of parameters* method, which leads to the solution for  $[SAB](t)$  (equation (38)).

The derivation of equations (52) to (55) follows the same steps as described above.

## References

- [1] Bronstein I, Semendjajew K (1989) Taschenbuch der Mathematik. Verlag Harri Deutsch.
